# Supplementary material
Source: MDPI journal article supplement (https://www.mdpi.com/2073-4395/9/7/391)

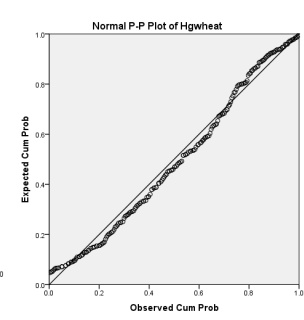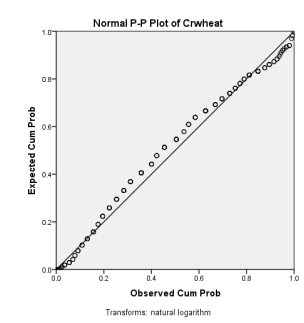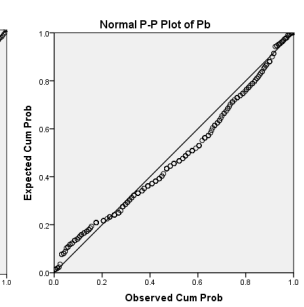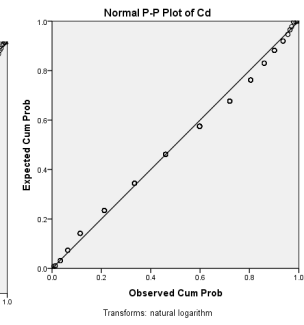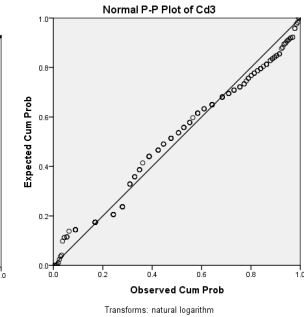

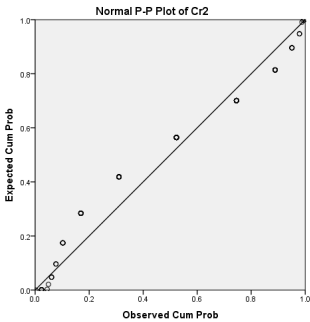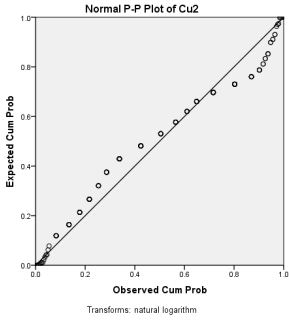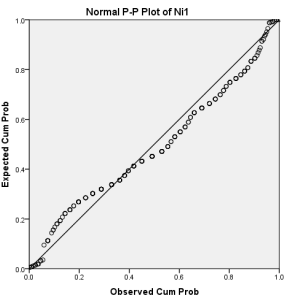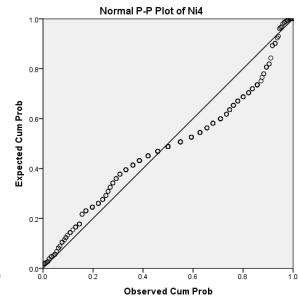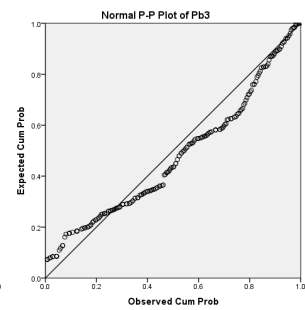

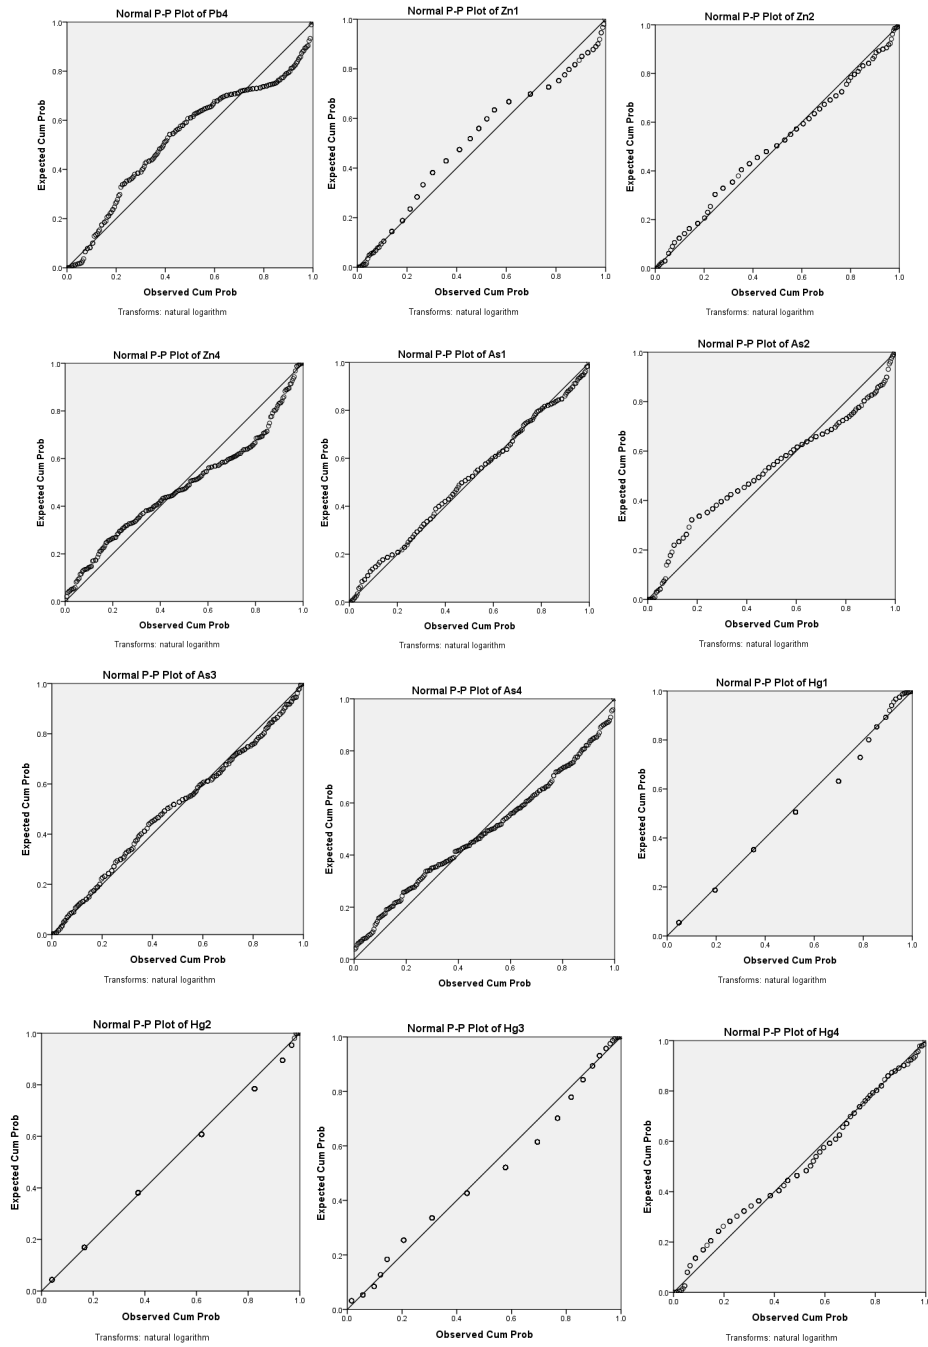

FigureS1 The normality test of trace elements by normal P-P plot

Supplement: s1 [file s1]
